# Supplementary material for: Clinical Features, Gene Alterations, and Outcomes in Prefibrotic and Overt Primary and Secondary Myelofibrotic Patients
Source: MDPI journal article supplement (doi:10.3390/cancers14184485), 2022-09-16
Supplement: s1 [file s1]

Supplementary Data

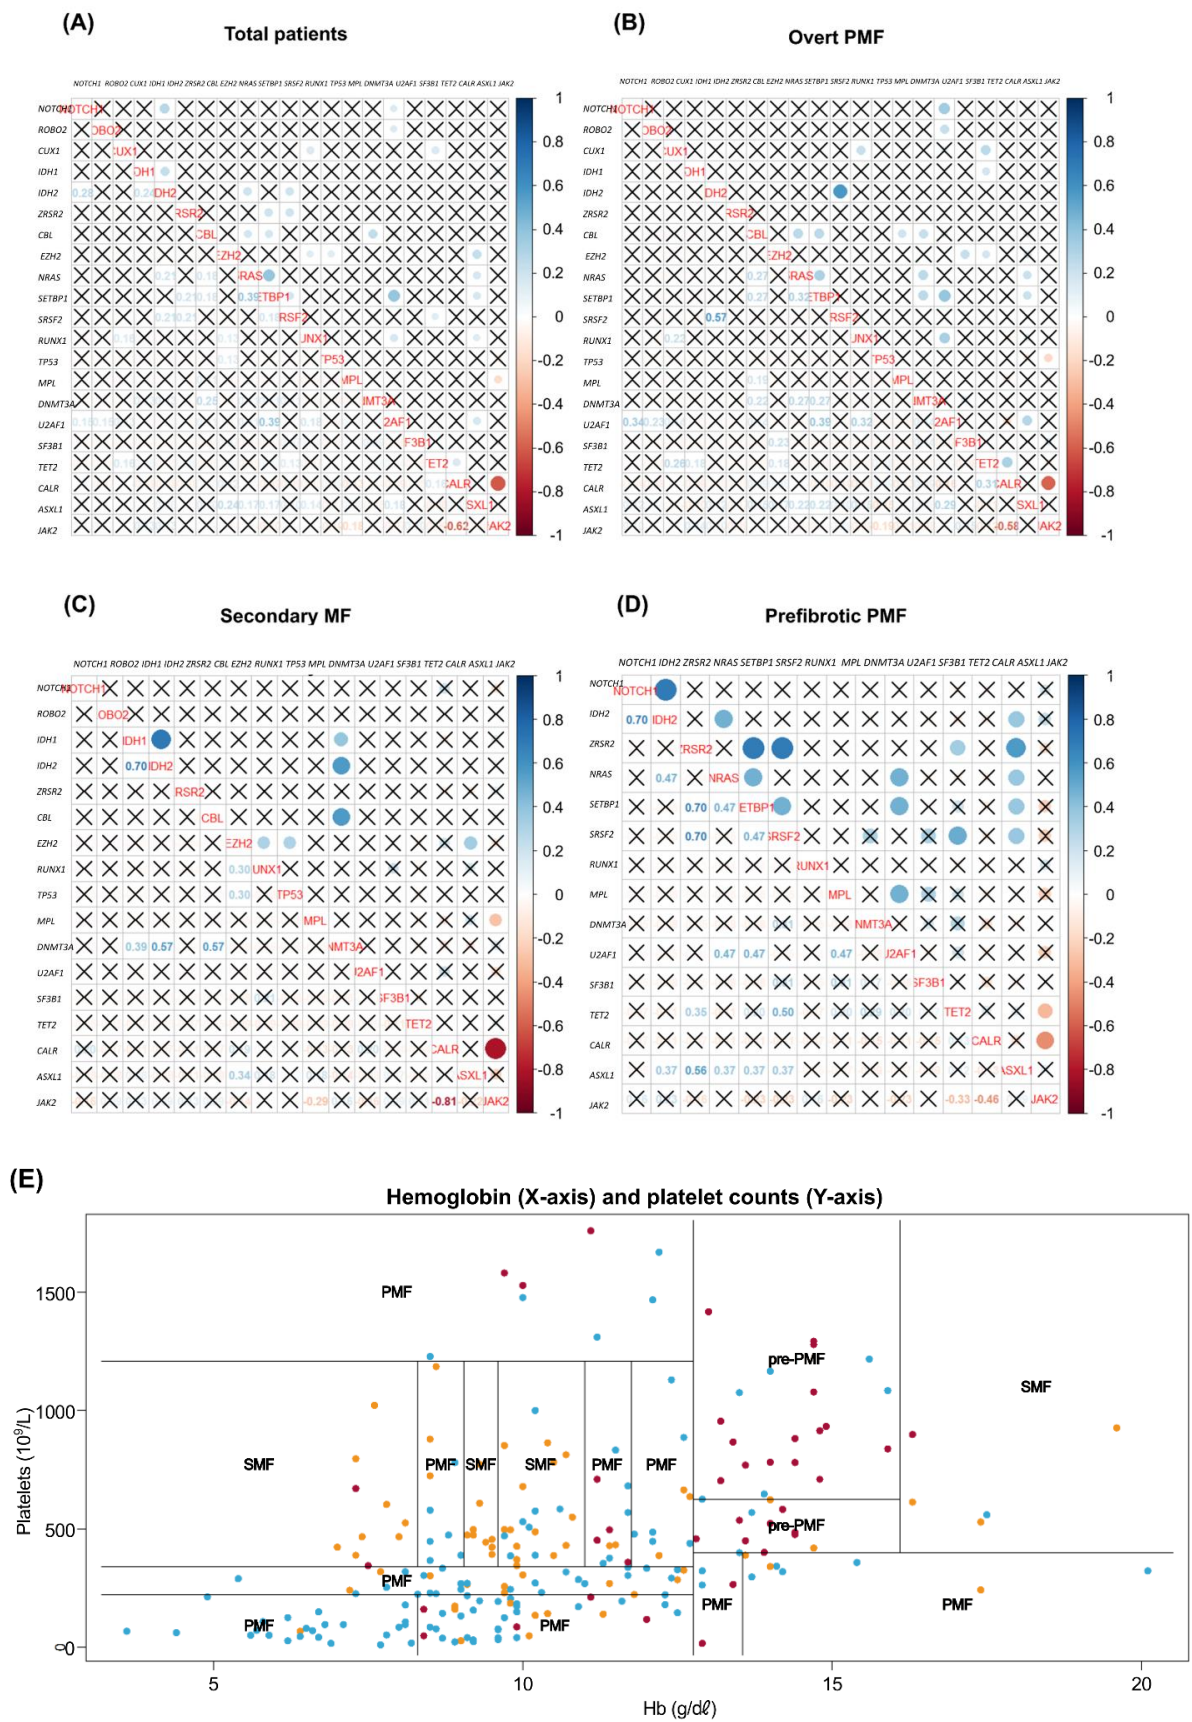

**Supplementary Figure S1.** Correlation between mutations in (A) overall cohort, (B) primary myelofibrosis (PMF), (C) secondary myelofibrosis (SMF), and (D) prefibrotic myelofibrosis (pre-PMF). X stands for p-value over 0.05; Numbers are correlation coefficient.

(E) Partition of PMF, SMF, and pre-PMF by the decision tree method according to hemoglobin level (X-axis) and platelet counts (Y-axis).

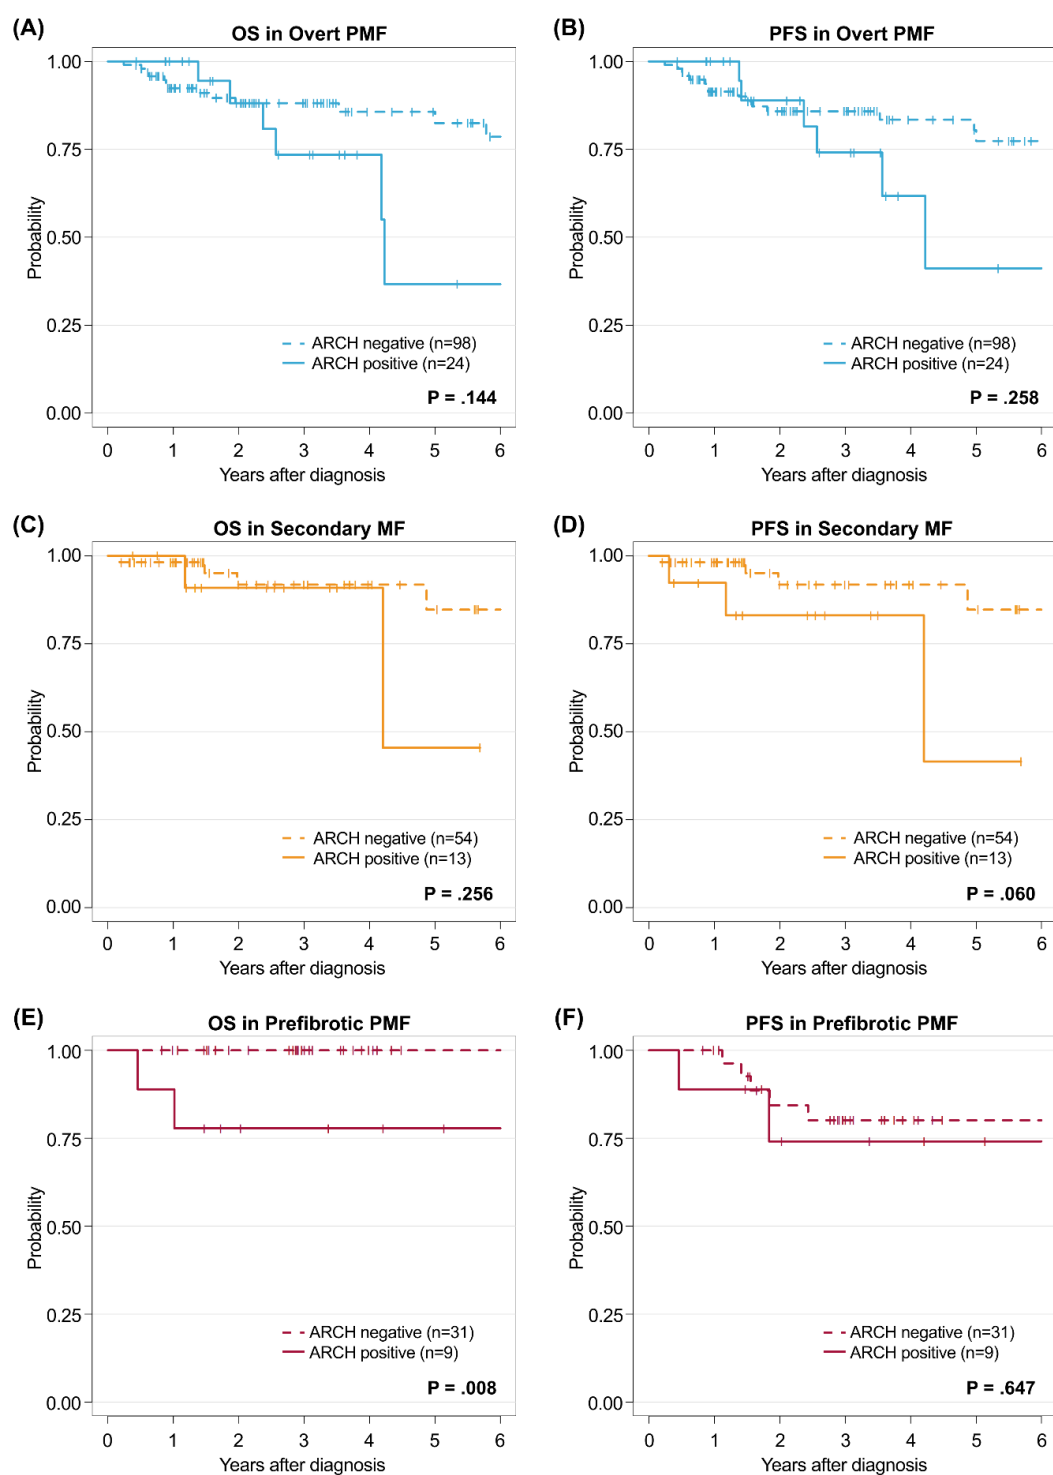

**Supplementary Figure S2.** Estimation of overall survival (OS) in (A) primary myelofibrosis (PMF), (C) secondary myelofibrosis (SMF), and (E) prefibrotic myelofibrosis (pre-PMF), and progression-free survival (PFS) in (B) PMF, (D) SMF, and (F) pre-PMF following CHIP of the high-risk progression group.

**Supplementary Table S1.** List of target genes in the NGS panel.

| Target genes   | Interval                  | Number of regions | Size (base pairs) |
|----------------|---------------------------|-------------------|-------------------|
| <i>ABCA12</i>  | chr2:215797358-216002931  | 54                | 7929              |
| <i>ABL1</i>    | chr9:133589707-133761070  | 12                | 3529              |
| <i>ASXL1</i>   | chr20:30946579-31025141   | 17                | 4720              |
| <i>ATM</i>     | chr11:108098352-108236235 | 62                | 9171              |
| <i>ATRX</i>    | chrX:76763829-77041487    | 36                | 7543              |
| <i>ATXN7L1</i> | chr7:105248299-105517004  | 15                | 3132              |
| <i>BCOR</i>    | chrX:39909169-39937182    | 15                | 5348              |
| <i>BRAF</i>    | chr7:140426294-140624503  | 21                | 2379              |
| <i>BRCC3</i>   | chrX:154299803-154348425  | 11                | 1021              |
| <i>CALR</i>    | chr19:13049494-13054795   | 10                | 1294              |
| <i>CBL</i>     | chr11:119077128-119170491 | 16                | 2721              |
| <i>CBLB</i>    | chr3:105377814-105588232  | 20                | 3079              |
| <i>CD101</i>   | chr1:117544440-117576723  | 9                 | 3066              |
| <i>CEBPA</i>   | chr19:33792244-33793425   | 1                 | 1182              |
| <i>CREBBP</i>  | chr16:3777719-3929917     | 31                | 7368              |
| <i>CSF1R</i>   | chr5:149433632-149465990  | 22                | 3003              |
| <i>CSF3R</i>   | chr1:36931697-36945097    | 16                | 2698              |
| <i>CTCF</i>    | chr16:67644736-67671775   | 10                | 2184              |
| <i>CUX1</i>    | chr7:101459311-101926382  | 34                | 5433              |
| <i>DNMT1</i>   | chr19:10244343-10311559   | 43                | 5292              |
| <i>DNMT3A</i>  | chr2:25457148-25536853    | 25                | 2888              |
| <i>EGFR</i>    | chr7:55086971-55273310    | 31                | 4084              |
| <i>EP300</i>   | chr22:41489009-41574960   | 31                | 7245              |
| <i>ERG</i>     | chr21:39739557-39947624   | 12                | 1764              |
| <i>ETV6</i>    | chr12:11803062-12044535   | 10                | 1443              |
| <i>EZH2</i>    | chr7:148504738-148544390  | 21                | 2456              |
| <i>FBXW7</i>   | chr4:153244033-153332955  | 14                | 2618              |
| <i>FLT3</i>    | chr13:28578189-28674647   | 25                | 3004              |
| <i>GATA1</i>   | chrX:48649517-48652675    | 5                 | 1346              |
| <i>GATA2</i>   | chr3:128199862-128205874  | 5                 | 1443              |
| <i>GNAS</i>    | chr20:57415162-57485884   | 17                | 4096              |
| <i>HIPK2</i>   | chr7:139257673-139477422  | 16                | 3708              |
| <i>IDH1</i>    | chr2:209101803-209116275  | 8                 | 1248              |
| <i>IDH2</i>    | chr15:90627498-90645622   | 11                | 1359              |
| <i>INVS</i>    | chr9:102866804-103062956  | 17                | 3395              |
| <i>IRF1</i>    | chr5:131819643-131825170  | 9                 | 978               |
| <i>JAK2</i>    | chr9:5021988-5126791      | 23                | 3399              |
| <i>KDM2B</i>   | chr12:121867919-122018816 | 29                | 4276              |
| <i>KDM6A</i>   | chrX:44732798-44970656    | 31                | 4470              |
| <i>KIT</i>     | chr4:55524182-55604723    | 21                | 2931              |
| <i>KMT2A</i>   | chr11:118307228-118392887 | 38                | 12082             |
| <i>KMT2D</i>   | chr12:49415563-49449107   | 55                | 16662             |
| <i>KRAS</i>    | chr12:25362729-25398318   | 6                 | 708               |
| <i>LAMB4</i>   | chr7:107664484-107763609  | 35                | 5507              |
| <i>MECOM</i>   | chr3:168802697-169381160  | 20                | 3816              |
| <i>MET</i>     | chr7:116335811-116436178  | 21                | 4359              |
| <i>MLL3</i>    | chr7:151833917-152132871  | 62                | 15030             |
| <i>MLL5</i>    | chr7:104681400-104753780  | 27                | 5743              |
| <i>MN1</i>     | chr22:28146903-28196531   | 2                 | 3963              |
| <i>MPL</i>     | chr1:43803520-43818443    | 12                | 1993              |
| <i>NCOR2</i>   | chr12:124809948-124979797 | 49                | 7734              |
| <i>NF1</i>     | chr17:29422226-29705949   | 63                | 9011              |
| <i>NLRP1</i>   | chr17:5405134-5487277     | 18                | 4493              |
| <i>NOTCH1</i>  | chr9:139390523-139440238  | 34                | 7668              |
| <i>NPM1</i>    | chr5:170814953-170837569  | 12                | 894               |

|                |                           |    |      |
|----------------|---------------------------|----|------|
| <i>NRAS</i>    | chr1:115251156-115258781  | 4  | 570  |
| <i>NRD1</i>    | chr1:52254908-52344287    | 34 | 3696 |
| <i>NUP98</i>   | chr11:3692612-3803347     | 35 | 5567 |
| <i>OCA2</i>    | chr15:28000534-28327020   | 24 | 2573 |
| <i>PDGFRA</i>  | chr4:55106220-55161439    | 24 | 3450 |
| <i>PHF12</i>   | chr17:27233201-27278622   | 17 | 3519 |
| <i>PHF6</i>    | chrX:133511648-133559360  | 9  | 1207 |
| <i>PRPF40B</i> | chr12:50017374-50037975   | 26 | 2682 |
| <i>PRPF8</i>   | chr17:1553953-1587865     | 42 | 7151 |
| <i>PTPN11</i>  | chr12:112856916-112942568 | 16 | 1822 |
| <i>RAD21</i>   | chr8:117859739-117878968  | 13 | 1896 |
| <i>RAD50</i>   | chr5:131893017-131978781  | 27 | 4211 |
| <i>RINT1</i>   | chr7:105172763-105207758  | 16 | 2417 |
| <i>ROBO1</i>   | chr3:78648063-79639061    | 34 | 5223 |
| <i>ROBO2</i>   | chr3:75986645-77695209    | 32 | 4862 |
| <i>RUNX1</i>   | chr21:36164432-36421196   | 11 | 1584 |
| <i>RUNX1T1</i> | chr8:92972470-93115112    | 20 | 2350 |
| <i>SETBP1</i>  | chr18:42281312-42643663   | 6  | 4980 |
| <i>SF3A1</i>   | chr22:30730583-30752781   | 16 | 2382 |
| <i>SF3B1</i>   | chr2:198257027-198299723  | 27 | 4045 |
| <i>SMC1A</i>   | chrX:53407024-53449549    | 26 | 3882 |
| <i>SMC3</i>    | chr10:112327575-112364060 | 29 | 3654 |
| <i>SRSF2</i>   | chr17:74732243-74733242   | 2  | 666  |
| <i>STAG2</i>   | chrX:123156478-123234447  | 34 | 3861 |
| <i>TET1</i>    | chr10:70332096-70451571   | 11 | 6411 |
| <i>TET2</i>    | chr4:106111627-106197676  | 10 | 6165 |
| <i>TP53</i>    | chr17:7565257-7579912     | 14 | 1378 |
| <i>TP53BP1</i> | chr15:43699581-43785241   | 31 | 6130 |
| <i>U2AF1</i>   | chr21:44513212-44527604   | 9  | 790  |
| <i>U2AF2</i>   | chr19:56166471-56185434   | 14 | 1541 |
| <i>WT1</i>     | chr11:32410604-32456891   | 11 | 1568 |
| <i>ZRSR2</i>   | chrX:15808619-15841365    | 12 | 1690 |

**Supplementary Table S2.** Genetic distribution of non-driver mutations in five subgroups by hierarchical clustering methods

|                          | Cluster 1 | Cluster 2 | Cluster 3 | Cluster 4 | Cluster 5 | P    |
|--------------------------|-----------|-----------|-----------|-----------|-----------|------|
|                          | (n = 104) | (n = 44)  | (n = 56)  | (n = 11)  | (n = 15)  |      |
| Myelofibrosis            |           |           |           |           |           | .166 |
| PMF, n (%)               | 53 (51.0) | 25 (56.8) | 35 (62.5) | 4 (40.0)  | 5 (33.3)  |      |
| SMF, n (%)               | 28 (26.9) | 11 (25.0) | 18 (32.1) | 3 (30.0)  | 7 (46.7)  |      |
| pre-PMF, n (%)           | 23 (22.1) | 8 (18.2)  | 3 (5.4)   | 3 (30.0)  | 3 (20.0)  |      |
| <i>JAK2</i> , n (%)      | 56 (53.8) | 21 (47.7) | 28 (50.0) | 8 (80.0)  | 7 (46.7)  | .426 |
| <i>CALR</i> _type, n (%) |           |           |           |           |           | .473 |

|                       |           |           |           |            |            |       |
|-----------------------|-----------|-----------|-----------|------------|------------|-------|
| Type1/like            | 17 (16.3) | 7 (15.9)  | 12 (21.4) | 0 (0.0%)   | 3 (20.0)   |       |
| Type2/like            | 6 (5.8)   | 2 (4.5)   | 4 (7.1)   | 1 (10.0%)  | 3 (20.0)   |       |
| Others                | 2 (1.9)   | 0 (0.0)   | 2 (3.6)   | 0 (0.0%)   | 1 (6.7)    |       |
| <i>MPL</i> , n (%)    | 3 (2.9)   | 2 (4.5)   | 4 (7.1)   | 1 (10.0%)  | 0 (0.0)    | .553  |
| <i>ASXL1</i> , n (%)  | 0 (0.0)   | 11 (25.0) | 55 (98.2) | 0 (0.0%)   | 0 (0.0)    | <.001 |
| <i>CBL</i> , n (%)    | 0 (0.0)   | 5 (11.4)  | 0 (0.0)   | 0 (0.0%)   | 0 (0.0)    | <.001 |
| <i>CUX1</i> , n (%)   | 0 (0.0)   | 4 (9.1)   | 0 (0.0)   | 0 (0.0)    | 0 (0.0)    | .002  |
| <i>DNMT3A</i> , n (%) | 0 (0.0)   | 11 (25.0) | 0 (0.0)   | 0 (0.0)    | 0 (0.0)    | <.001 |
| <i>EZH2</i> , n (%)   | 0 (0.0)   | 0 (0.0)   | 5 (8.9)   | 0 (0.0)    | 0 (0.0)    | .003  |
| <i>IDH1</i> , n (%)   | 0 (0.0)   | 4 (9.1)   | 0 (0.0)   | 0 (0.0)    | 0 (0.0)    | .002  |
| <i>IDH2</i> , n (%)   | 0 (0.0)   | 2 (4.5)   | 2 (3.6)   | 0 (0.0)    | 0 (0.0)    | .250  |
| <i>NOTCH1</i> , n (%) | 0 (0.0)   | 3 (6.8)   | 0 (0.0)   | 0 (0.0)    | 0 (0.0)    | .012  |
| <i>NRAS</i> , n (%)   | 0 (0.0)   | 2 (4.5)   | 3 (5.4)   | 0 (0.0)    | 0 (0.0)    | .154  |
| <i>RUNX1</i> , n (%)  | 0 (0.0)   | 6 (13.6)  | 2 (3.6)   | 0 (0.0)    | 0 (0.0)    | .001  |
| <i>SETBP1</i> , n (%) | 0 (0.0)   | 3 (6.8)   | 2 (3.6)   | 0 (0.0)    | 0 (0.0)    | .099  |
| <i>SF3B1</i> , n (%)  | 0 (0.0)   | 2 (4.5)   | 5 (8.9)   | 10 (100.0) | 0 (0.0)    | <.001 |
| <i>SRSF2</i> , n (%)  | 0 (0.0)   | 1 (2.3)   | 4 (7.1)   | 0 (0.0)    | 0 (0.0)    | .053  |
| <i>TET2</i> , n (%)   | 0 (0.0)   | 7 (15.9)  | 6 (10.7)  | 0 (0.0)    | 15 (100.0) | <.001 |
| <i>TP53</i> , n (%)   | 0 (0.0)   | 7 (15.9)  | 1 (1.8)   | 0 (0.0)    | 0 (0.0)    | <.001 |
| <i>U2AF1</i> , n (%)  | 0 (0.0)   | 11 (25.0) | 0 (0.0)   | 0 (0.0)    | 0 (0.0)    | <.001 |
| <i>ZRSR2</i> , n (%)  | 0 (0.0)   | 3 (6.8)   | 1 (1.8)   | 0 (0.0)    | 0 (0.0)    | .064  |

---

SMF, secondary myelofibrosis; PMF, primary myelofibrosis; pre-PMF, prefibrotic,

myelofibrosis; n, number; P, p-value

**Supplementary Table S3.** *p*-value of OS and PFS in between clusters.

|                      | C1 vs the<br>other clusters | C2 vs the<br>other clusters | C3 vs the<br>other clusters | C1 vs C2 | C1 vs C3 | C2 vs. C3 |
|----------------------|-----------------------------|-----------------------------|-----------------------------|----------|----------|-----------|
| <b>Whole cohort</b>  |                             |                             |                             |          |          |           |
| OS, <i>p</i> -value  | .035                        | .002                        | .386                        | .002     | .079     | .144      |
| PFS, <i>p</i> -value | .033                        | .002                        | .421                        | .002     | .088     | .140      |
| <b>PMF</b>           |                             |                             |                             |          |          |           |
| OS, <i>p</i> -value  | .188                        | .163                        | .468                        | .162     | .226     | .492      |
| PFS, <i>p</i> -value | .097                        | .084                        | .677                        | .073     | .224     | .335      |
| <b>SMF</b>           |                             |                             |                             |          |          |           |
| OS, <i>p</i> -value  | .239                        | .001                        | .411                        | .008     | .946     | .016      |
| PFS, <i>p</i> -value | .157                        | .001                        | .872                        | .008     | .449     | .066      |
| <b>pre-PMF</b>       |                             |                             |                             |          |          |           |
| OS, <i>p</i> -value  | .107                        | .317                        | .013                        | .114     | .006     | .522      |
| PFS, <i>p</i> -value | .458                        | .522                        | .002                        | .468     | .005     | .152      |
